# Supplementary material for: Ba2HgTe5: a Hg-based telluride with giant birefringence induced by linear [HgTe2] units
Source: Royal Society of Chemistry journal article supplement (doi:10.1039/d2qi01387h), 2022-01-01
Supplement: d2qi01387h1.pdf [file d2qi01387h1.pdf]

*Supporting Information for*

**Ba<sub>2</sub>HgTe<sub>5</sub>: A Hg-based Telluride with Giant Birefringence Induced  
by Linear [HgTe<sub>2</sub>] units**

Mengran Sun,<sup>a,b,c</sup> and Jiyong Yao<sup>a,b,\*</sup>

a Beijing Center for Crystal Research and Development, Key Lab of Functional Crystals and Laser Technology,

Technical Institute of Physics and Chemistry, Chinese Academy of Sciences, Beijing 100190, P. R. China.

b Center of Materials Science and Optoelectronics Engineering, University of Chinese Academy of Sciences, Beijing

100049, P. R. China.

c University of Chinese Academy of Sciences, Beijing 100049, P. R. China.

\*Corresponding author:

Jiyong Yao; [jyao@mail.ipc.ac.cn](mailto:jyao@mail.ipc.ac.cn).

1. Figure S1. The element analysis of Ba<sub>2</sub>HgTe<sub>5</sub>.
2. Figure S2. Coordination modes of Ba atoms in Ba<sub>2</sub>HgTe<sub>5</sub>.
3. Figure S3. The PXRD of Ba<sub>2</sub>HgTe<sub>5</sub> before and after DSC measurements.
4. Table S1. Atomic coordinates, equivalent isotropic displacement parameters, and Wyckoff sites for Ba<sub>2</sub>HgTe<sub>5</sub>.
5. Table S2. Selected bond Lengths and angles for Ba<sub>2</sub>HgTe<sub>5</sub>.
6. Table S3. Comparison of the birefringence of the title compound and some known Hg-based chalcogenides.

## 1. Figure S1

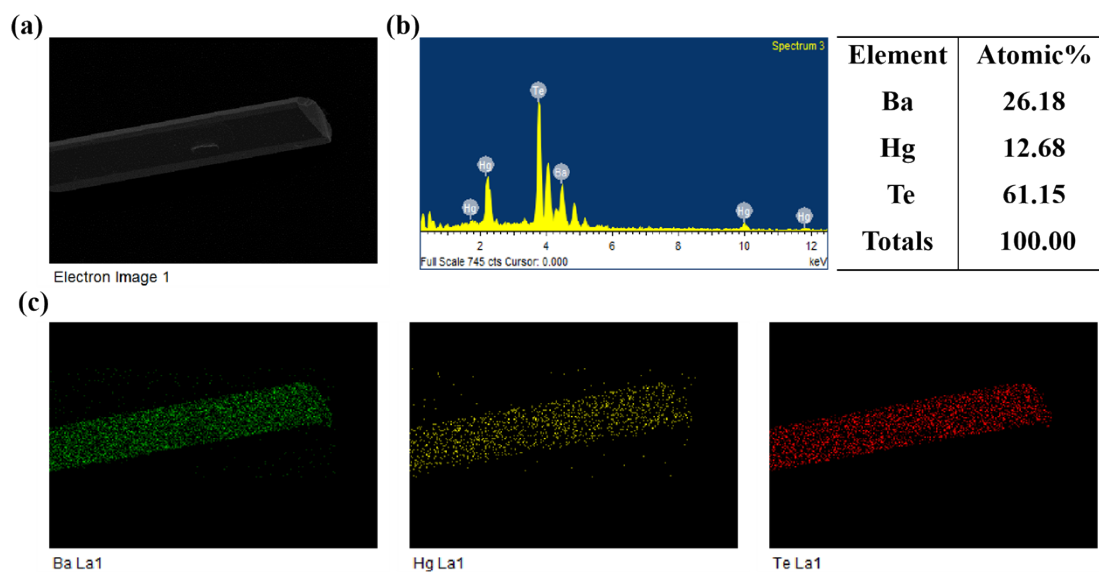

(a) Scanning electron microscopy (SEM) image of  $\text{Ba}_2\text{HgTe}_5$ ; (b) Elemental analysis of  $\text{Ba}_2\text{HgTe}_5$  by EDX spectroscopy. (c) Elemental distribution of the as-grown crystal.

## 2. Figure S2

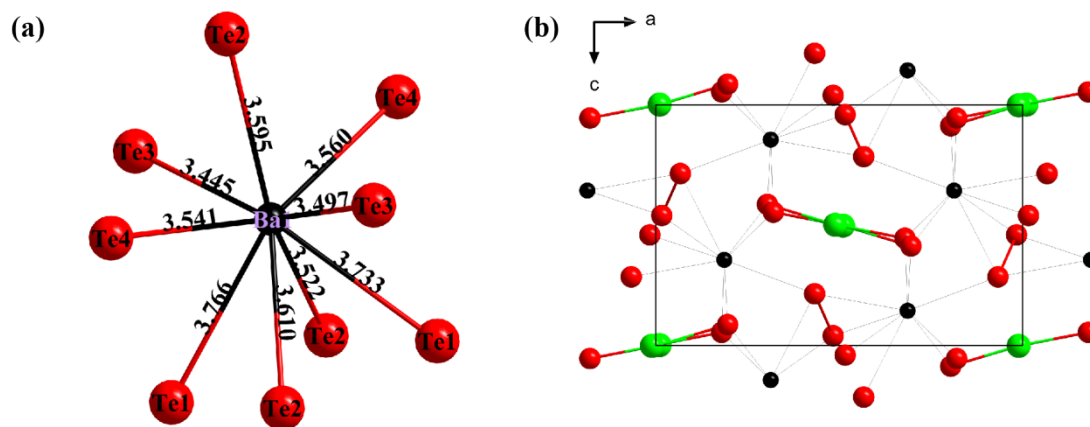

(a) Coordination mode of Ba atom and (b)  $[\text{BaTe}_9]$  polyhedra in the unit cell of  $\text{Ba}_2\text{HgTe}_5$ .

### 3. Figure S3

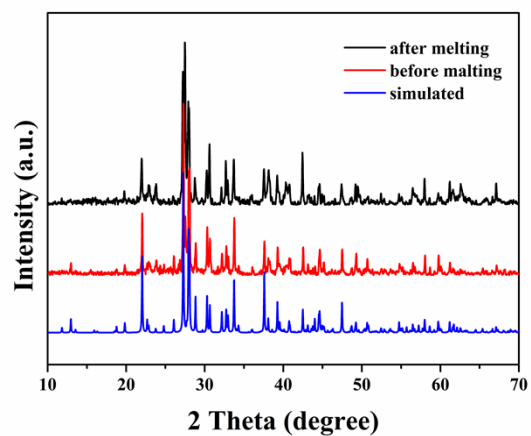

The PXRD of  $\text{Ba}_2\text{HgTe}_5$  before and after DSC measurements.

**4. Table S1** Atomic coordinates ( $\times 10^4$ ), equivalent isotropic displacement parameters ( $\text{\AA}^2 \times 10^3$ ), and wyckoff sites for  $\text{Ba}_2\text{HgTe}_5$ .

| Atom | Wyckoff site | x         | y         | z         | $U_{eq}$ |
|------|--------------|-----------|-----------|-----------|----------|
| Ba1  | 8d           | 31340(8)  | 49284(13) | 14401(13) | 367(4)   |
| Hg1  | 4c           | 48939(10) | 7500      | 49840(17) | 544(4)   |
| Te1  | 4c           | 51624(14) | 2500      | 403(2)    | 388(5)   |
| Te2  | 8d           | 56700(9)  | 48275(14) | 21475(15) | 393(4)   |
| Te3  | 4c           | 30412(14) | 7500      | 4133(2)   | 380(5)   |
| Te4  | 4c           | 67949(14) | 7500      | 5545(2)   | 388(5)   |

**5. Table S2** Selected bond lengths ( $\text{\AA}$ ) and angles ( $^\circ$ ) for  $\text{Ba}_2\text{HgTe}_5$ .

| Lengths( $\text{\AA}$ ) |           |                          |            |
|-------------------------|-----------|--------------------------|------------|
| Hg1–Te3                 | 2.642(2)  | Te1–Te2                  | 2.8053(18) |
| Hg1–Te4                 | 2.644(2)  | Te1–Te2 <sup>5</sup>     | 2.8053(18) |
| Angles( $^\circ$ )      |           |                          |            |
| Te3–Hg1–Te4             | 174.20(9) | Te2–Te1–Te2 <sup>5</sup> | 105.00(8)  |

Symmetry transformations used to generate equivalent atoms:

|                                    |                                      |                                       |                                   |
|------------------------------------|--------------------------------------|---------------------------------------|-----------------------------------|
| <sup>1</sup> $-x+1/2, -y+1, z-1/2$ | <sup>2</sup> $x-1/2, y, -z+1/2$      | <sup>3</sup> $-x+1, -y+1, -z+1$       | <sup>4</sup> $-x+1, -y+1, -z$     |
| <sup>5</sup> $x, -y+1/2, z$        | <sup>6</sup> $-x+1/2, -y+1, z+1/2$   | <sup>7</sup> $-x+1, y-1/2, -z$        | <sup>8</sup> $x+1/2, y, -z+1/2$   |
| <sup>9</sup> $x, -y+3/2, z$        | <sup>10</sup> $-x+1/2, y+1/2, z+1/2$ | <sup>11</sup> $x+1/2, -y+3/2, -z+1/2$ | <sup>12</sup> $-x+1, y+1/2, -z+1$ |

**6. Table S3** Comparison of the birefringence of the title compound and some known Hg-based chalcogenides.

| Compound                                          | S.G.                     | Hg polyhedra                          | $\Delta n$ | SHG<br>intensity | Refs.            |
|---------------------------------------------------|--------------------------|---------------------------------------|------------|------------------|------------------|
| Ba <sub>2</sub> HgTe <sub>5</sub>                 | <i>Pnma</i>              | HgTe <sub>2</sub>                     | 0.643      | /                | <b>This work</b> |
| BaHgGeSe <sub>4</sub>                             | <i>Ama2</i>              | HgSe <sub>4</sub>                     | 0.27       | 4.7 × AGS        | 1                |
| EuHgGeS <sub>4</sub>                              | <i>Ama2</i>              | HgS <sub>4</sub>                      | 0.25       | 0.9 × AGS        | 2                |
| BaHgSe <sub>2</sub>                               | <i>Pmc2</i> <sub>1</sub> | HgSe <sub>3</sub> , HgSe <sub>2</sub> | 0.1473     | 1.5 × AGS        | 3                |
| CuHgPS <sub>4</sub>                               | <i>Pna2</i> <sub>1</sub> | HgS <sub>4</sub>                      | 0.11       | 6.5 × AGS        | 4                |
| AgHgPS <sub>4</sub>                               | <i>Pn</i>                | HgS <sub>4</sub>                      | 0.11       | 5.09 × AGS       | 5                |
| Hg <sub>2</sub> GeSe <sub>4</sub>                 | I- 4                     | HgSe <sub>4</sub>                     | 0.11       | 2.1 × AGS        | 6                |
| BaHgSnS <sub>4</sub>                              | <i>Ama2</i>              | HgS <sub>4</sub>                      | 0.1        | 2.8 × AGS        | 7                |
| BaHgSnSe <sub>4</sub>                             | <i>Fdd2</i>              | HgSe <sub>4</sub>                     | 0.1        | 5.1 × AGS        | 7                |
| HgGa <sub>2</sub> S <sub>4</sub>                  | I- 4                     | HgS <sub>4</sub>                      | 0.078      | 2-3 × AGS        | 8                |
| KHg <sub>4</sub> Ga <sub>5</sub> Se <sub>12</sub> | <i>R3</i>                | HgSe <sub>4</sub>                     | 0.072      | 20 × AGS         | 9                |
| BaHgS <sub>2</sub>                                | <i>Pmc2</i> <sub>1</sub> | HgS <sub>4</sub> , HgS <sub>2</sub>   | 0.07       | 6.5 × AGS        | 10               |
| Hg <sub>3</sub> P <sub>2</sub> S <sub>8</sub>     | <i>Aba2</i>              | HgS <sub>4</sub>                      | 0.05       | 4.2 × AGS        | 11-12            |

## References

1. Guo, Y.; Liang, F.; Yin, W.; Li, Z.; Luo, X.; Lin, Z.; Yao, J.; Mar, A.; Wu, Y., BaHgGeSe<sub>4</sub> and SrHgGeSe<sub>4</sub>: Two New Hg-Based Infrared Nonlinear Optical Materials. *Chem. Mater.* **2019**, *31* (8), 3034-3040.
2. Perdew, J. P.; Burke, K.; Ernzerhof, M., Generalized Gradient Approximation Made Simple. *Phys. Rev. Lett.* **1996**, *77* (18), 3865-3868.
3. Li, C.; Yin, W.; Gong, P.; Li, X.; Zhou, M.; Mar, A.; Lin, Z.; Yao, J.; Wu, Y.; Chen, C., Trigonal Planar [HgSe<sub>3</sub>]<sup>4-</sup> Unit: A New Kind of Basic Functional Group in IR Nonlinear Optical Materials with Large Susceptibility and Physicochemical Stability. *J. Am. Chem. Soc.* **2016**, *138* (19), 6135-6138.
4. Yan, M.; Sun, Z. D.; Yao, W. D.; Zhou, W.; Liu, W.; Guo, S., A Highly Distorted HgS<sub>4</sub> Tetrahedron-Induced Moderate Second-Harmonic Generation Response of EuHgGeS<sub>4</sub>. *Inorg. Chem. Front.* **2020**, *7* (13), 2451-2458.
5. Li, M.; Ma, Z.; Li, B.; Wu, X.; Lin, H.; Zhu, Q., HgCuPS<sub>4</sub>: An Exceptional Infrared Nonlinear Optical Material with Defect Diamond-Like Structure. *Chem. Mater.* **2020**, *32* (10), 4331-4339.
6. Xing, W.; Wang, N.; Tang, C.; Li, C.; Lin, Z.; Yao, J.; Yin, W.; Kang, B., From AgGaS<sub>2</sub> to AgHgPS<sub>4</sub>: Vacancy Defects and Highly Distorted HgS<sub>4</sub> Tetrahedra Double-Induced Remarkable Second-Harmonic Generation Response. *J. Mater. Chem. C* **2021**, *9* (3), 1062-1068.
7. Guo, Y.; Liang, F.; Yao, J.; Lin, Z.; Yin, W.; Wu, Y.; Chen, C., Nonbonding Electrons Driven Strong SHG Effect in Hg<sub>2</sub>GeSe<sub>4</sub>: Experimental and Theoretical Investigations. *Inorg. Chem.* **2018**, *57* (12), 6795-6798.
8. Umemura, N.; Mikami, T.; Kato, K., Phase-Matching Properties of HgGa<sub>2</sub>S<sub>4</sub> for SHG in the 0.958–9.2714 μm Range. *Opt. Commun.* **2012**, *285* (6), 1394-1396.
9. Guo, Y.; Liang, F.; Li, Z.; Xing, W.; Lin, Z.; Yao, J.; Mar, A.; Wu, Y., AHgSnQ<sub>4</sub> (A = Sr, Ba; Q = S, Se): A Series of Hg-Based Infrared Nonlinear-Optical Materials with Strong Second-Harmonic-Generation Response and Good Phase Matchability. *Inorg. Chem.* **2019**, *58* (15), 10390-10398.
10. Wu, K.; Su, X.; Pan, S.; Yang, Z., Synthesis and Characterization of Mid-Infrared Transparency Compounds: Acentric BaHgS<sub>2</sub> and Centric Ba<sub>8</sub>Hg<sub>4</sub>S<sub>5</sub>Se<sub>7</sub>. *Inorg. Chem.* **2015**, *54* (6), 2772-2779.
11. Chu, Y.; Wang, P.; Zeng, H.; Cheng, S.; Su, X.; Yang, Z.; Li, J.; Pan, S., Hg<sub>3</sub>P<sub>2</sub>S<sub>8</sub>: A New Promising Infrared Nonlinear Optical Material with a Large Second-Harmonic-Generation and a High Laser-Induced Damage Threshold. *Chem. Mater.* **2021**, *33* (16), 6514-6521.
12. Xing, W.; Liang, F.; Tang, C.; Uykur, E.; Lin, Z.; Yao, J.; Yin, W.; Kang, B., Highly Distorted [HgS<sub>4</sub>] Motif-Driven Structural Symmetry Degradation and Strengthened Second-Harmonic-Generation Response in the Defect Diamond-Like Chalcogenide Hg<sub>3</sub>P<sub>2</sub>S<sub>8</sub>. *ACS Appl. Mater. Inter.* **2021**, *13* (31), 37331-37338.
